# Supplementary material for: Development of SLAF-Sequence and Multiplex SNaPshot Panels for Population Genetic Diversity Analysis and Construction of DNA Fingerprints for Sugarcane
Source: MDPI journal article supplement (doi:10.3390/genes13081477), 2022-08-19
Supplement: s1 [file s1]

Supplementary Figure S2. Histogram of genetic distance matrix and Cluster analysis diagram based respectively on 32 core SNP markers.

A

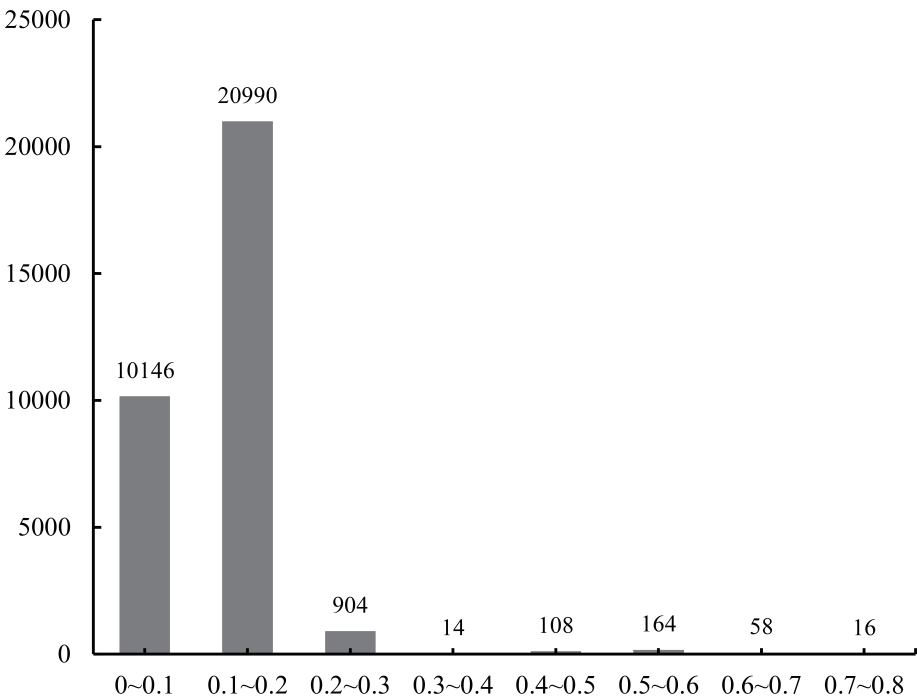

B

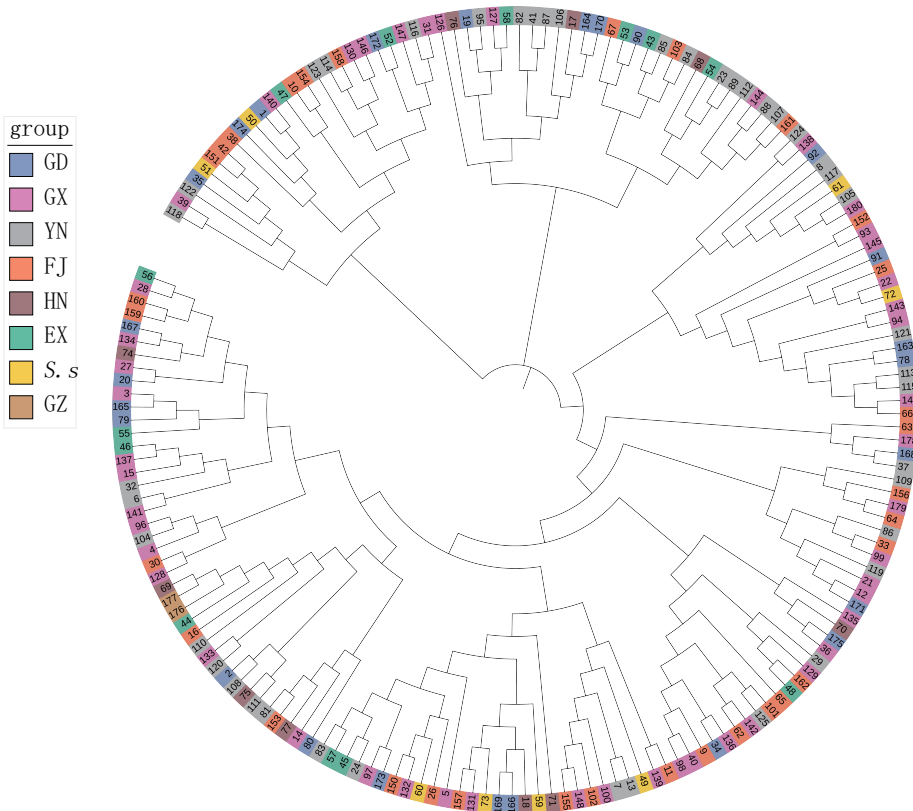

(A) Histogram of genetic distance matrix based on 32 core SNP markers. (B) Cluster analysis diagram based respectively on 32 core SNP markers.
