# Supplementary material for: Development of SLAF-Sequence and Multiplex SNaPshot Panels for Population Genetic Diversity Analysis and Construction of DNA Fingerprints for Sugarcane
Source: Genes (Basel). 2022 Aug 19;13(8):1477. doi: 10.3390/genes13081477 (PMC9408448; doi:10.3390/genes13081477)
Supplement: Supplementary file 1 [file genes-13-01477-s001.zip]

Archive with 7 entries (7 files):
- Supplementary Figure S1 .pdf
- Supplementary Figure S2.pdf
- Supplementary Table S1.xlsx
- Supplementary Table S2.xlsx
- Supplementary Table S3.xlsx
- Supplementary Table S4.xlsx
- Supplementary Table S5.xlsx
