# Supplementary material for: Development of SLAF-Sequence and Multiplex SNaPshot Panels for Population Genetic Diversity Analysis and Construction of DNA Fingerprints for Sugarcane
Source: Genes (Basel). 2022 Aug 19;13(8):1477. doi: 10.3390/genes13081477 (PMC9408448; doi:10.3390/genes13081477)
Supplement: Supplementary file 1 [file genes-13-01477-s001.zip › Supplementary Table S1.xlsx]

## Sheet: Sheet1
		Table S1. Information of 103 sugarcane accessions
		Code	Accession Name		Group
		1	Chuanzhe83-181		SC
		2	Chuanzhe85-421		SC
		3	Ganzhe72-12		JX
		4	Ganzhe82-660		JX
		5	Guitang69-156		GX
		6	Guitang87-7		GX
		7	Huanan65-12		GD
		8	Neijiang57-416		SC
		9	Neijiang61-380		SC
		10	Neijiang81-762		SC
		11	Yuenong73-204		GD
		12	Yuenong79-780		GD
		13	Yuetang63-237		GD
		14	Yuetang64-395		GD
		15	Yuetang65-1279		GD
		16	Yuetang81-342		GD
		17	Yuetang85-177		GD
		18	Yuetang85-5		GD
		19	Yuetang86-05		GD
		20	Zhanzhe80-101		GD
		21	Chuanzhe89-103		SC
		22	Dezhe03-83		YN
		23	Funong81-745		FJ
		24	Guitang73-167		GD
		25	Mintang86-2121		FJ
		26	Mintang86-62		FJ
		27	Mintang86-887		FJ
		28	Mintang88-101		FJ
		29	Yuetang71-210		GD
		30	Yuetang83-271		GD
		31	Yunzhe89-351		YN
		32	CP65-357		EX
		33	CP80-1827		EX
		34	Ganjiang18		JX
		35	Ganzhe14		JX
		36	Mintang46-202		FJ
		37	Zhanjiang74141		GD
		38	ROC25		EX
		39	Funong09-12206		FJ
		40	Funong09-4095		FJ
		41	Funong41		FJ
		42	Guitang42		GD
		43	Liucheng05-136		YN
		44	Yuetang93-159		GD
		45	Yunrui10-701		YN
		46	Yunzhe09-1601		YN
		47	Zhongzhe1		GX
		48	Zhongzhe2		GX
		49	Zhongtang13-01		FJ
		50	Yunrui12-263		YN
		51	Yuegan51		GD
		52	Yuegan52		GD
		53	Zhongzhe13		GX
		54	Yunzhe11-3208		YN
		55	Yunzhe11-1074		YN
		56	Yunrui11-450		YN
		57	Dezhe12-88		YN
		58	Funong09-7111		FJ
		59	Zhongtang1201		FJ
		60	Zhongtang1202		FJ
		61	Zhongzhe10		GX
		62	Yunzhe11-1204		YN
		63	Funong09-6201		FJ
		64	Yuegan49		GD
		65	Funong11-2901		FJ
		66	Yuegan49		GD
		67	Guitang10-701		GX
		68	Mintang11-610		FJ
		69	Guitang11-1076		GD
		70	Fujian89-I-7		S.s
		71	Fujian89-II-11		S.s
		72	Guangdong48		S.s
		73	Guangdong50		S.s
		74	Guizhou-II-26		S.s
		75	Guizhou-II-4		S.s
		76	Hainan92-75		S.s
		77	Hainan92-76		S.s
		78	Hunangeshoumi		S.s
		79	Jiangxi79-17		S.s
		80	Jiangxi79-25		S.s
		81	Lingshui4		S.s
		82	Longchuangeshoumi		S.s
		83	Manhao1		S.s
		84	Manhao2		S.s
		85	Sichuan79-I-1		S.s
		86	Sichuan79-I-4		S.s
		87	Yacheng11		S.s
		88	Yacheng12		S.s
		89	Yunnan12		S.s
		90	Yunnan24		S.s
		91	Yunnan76-II-35		S.s
		92	Zhejianggeshoumi		S.s
		93	Yuetang89-240		GD
		94	Yunzhe89-7		YN
		95	ROC22		EX
		96	Zhongzhe6		FJ
		97	Yunrui10-187		YN
		98	Funong10-0574		FJ
		99	Guitang13-386		GD
		100	Yuegan48		GD
		101	Yuegan50		GD
		102	Yuegan53		GD
		103	Yunnan-82-29		S.s
