# Supplementary material for: Development of SLAF-Sequence and Multiplex SNaPshot Panels for Population Genetic Diversity Analysis and Construction of DNA Fingerprints for Sugarcane
Source: Genes (Basel). 2022 Aug 19;13(8):1477. doi: 10.3390/genes13081477 (PMC9408448; doi:10.3390/genes13081477)
Supplement: Supplementary file 1 [file genes-13-01477-s001.zip › Supplementary Table S2.xlsx]

## Sheet: Sheet1
	Table S2. Information of 180 sugarcane accessions
		Code	Accession Name	Group
		1	Yuegan49	GD
		2	Yuegan56	GD
		3	Guitang08-8	GX
		4	Guitang10-701	GX
		5	Guitang11-1076	GX
		6	Yunzhe10-1666	YN
		7	Yunzhe11-1204	YN
		8	Yunrui11-450	YN
		9	Funong08-3214	FJ
		10	Funong09-6201	FJ
		11	Funong09-2907	FJ
		12	Liucheng09-15	GX
		13	Dezhe12-88	YN
		14	Zhongzhe1	GX
		15	Zhongzhe10	GX
		16	Mintang11610	FJ
		17	Zhongtang1201	HN
		18	Zhongtang1202	HN
		19	Yuegan48	GD
		20	Yuegan50	GD
		21	Guitang55	GX
		22	Guitang58	GX
		23	Yunzhe11-3898	YN
		24	Yunrui10-187	YN
		25	Funong09-7111	FJ
		26	Funong09-12206	FJ
		27	Guitang06-1492	GX
		28	Guitang08-1533	GX
		29	Yunzhe09-1601	YN
		30	Funong09-4095	FJ
		31	Liucheng07-506	GX
		32	Dezhe09-78	YN
		33	Mintang09-2005	FJ
		34	Yuegan47	GD
		35	Haizhe22	GD
		36	Guitang54	GX
		37	Yunzhe08-1095	YN
		38	Funong09-2201	FJ
		39	Guitang57	GX
		40	Liucheng07-150	GX
		41	Dezhe07-36	YN
		42	Mintang06-1045	FJ
		43	Cp49-50	EX
		44	Cp65-357	EX
		45	CP72-1210	EX
		46	Cp80-1742	EX
		47	Cp84-1198	EX
		48	Cp96-1602	EX
		49	Yunnan82-110	S.s
		50	Yunnan82-20	S.s
		51	Yunnan83-160	S.s
		52	Fujian92-1-11	S.s
		53	Fujian88-1-13	S.s
		54	Hocp92-64	EX
		55	Nco310	EX
		56	Fujian89-1-21	S.s
		57	ROC10	EX
		58	ROC22	EX
		59	Yunnan83-201	S.s
		60	Yunnan75-2-11	S.s
		61	Yunnan83-204	S.s
		62	Funong81-745	FJ
		63	Funong83-36	FJ
		64	Funong90-0230	FJ
		65	Funong91-21	FJ
		66	Gantang05-1	FJ
		67	Ganzhe14	FJ
		68	Yacheng06-63	HN
		69	Yacheng06-92	HN
		70	Yacheng07-71	HN
		71	Yacheng57-25	HN
		72	Yunnan83-171	S.s
		73	Yunnan03-485	S.s
		74	Yacheng64-389	HN
		75	Yacheng71-370	HN
		76	Yacheng96-40	HN
		77	Yacheng96-66	HN
		78	Yuegan16	GD
		79	Yuegan24	GD
		80	Yuegan34	GD
		81	Yunrui09-753	YN
		82	Yunrui05-566	YN
		83	Yunrui10-187	YN
		84	Yunrui03-394	YN
		85	Yunrui05-175	YN
		86	Yunrui05-785	YN
		87	Yunrui06-2416	YN
		88	Yunrui09-751	YN
		89	Yunrui10-701	YN
		90	Zhanjiang74-141	GD
		91	Zhanjiang79-741	GD
		92	Zhanzhe96-126	GD
		93	Zhongzhe2	GX
		94	Zhongzhe6	GX
		95	Dezhe93-88	YN
		96	Guitang29	GX
		97	Guitang43	GX
		98	Guitang44	GX
		99	Guitang45	GX
		100	Liucheng07-500	GX
		101	Funong40	FJ
		102	Mintang92-649	FJ
		103	Funong15	FJ
		104	Yunzhe89-351	YN
		105	Yunzhe89-155	YN
		106	Yunzhe92-19	YN
		107	Yunzhe94-375	YN
		108	Yunzhe98-46	YN
		109	Yunzhe99-596	YN
		110	Yunzhe99-91	YN
		111	Yunzhe01-1413	YN
		112	Yunzhe02-2332	YN
		113	Yunzhe03-194	YN
		114	Yunzhe03-258	YN
		115	Yunzhe04-621	YN
		116	Yunzhe05-51	YN
		117	Yunzhe05-596	YN
		118	Yunzhe06-160	YN
		119	Yunzhe06-362	YN
		120	Yunzhe06-407	YN
		121	Yunzhe06-80	YN
		122	Yunzhe08-2060	YN
		123	Yunrui07-1433	YN
		124	Dezhe93-94	YN
		125	Dezhe03-83	YN
		126	Guitang20（Guitang93-102）	GX
		127	Guitang21（Guitang94-119）	GX
		128	Guitang23（Guitang93-103）	GX
		129	Guitang24（Guitang94-116）	GX
		130	Guitang25（Guitang96-44）	GX
		131	Guitang26（Guitang96-211）	GX
		132	Guitang28（Guitang00-122）	GX
		133	Guitang30（Guitang02-237）	GX
		134	Guitang31（Guitang02-281）	GX
		135	Guitang32（Guitang02-208）	GX
		136	Guitang33（Guitang02-770）	GX
		137	Guitang34（Guitang02-833）	GX
		138	Guitang35（Guitang02-901）	GX
		139	Guitang36（Guitang03-1403）	GX
		140	Guitang40（Guitang02-1156）	GX
		141	Guitang41（Guitang03-2309）	GX
		142	Guitang42（Guitang04-1001）	GX
		143	Guitang46（Guitang06-244）	GX
		144	Guitang47（Guitang06-1721）	GX
		145	Guitang48（Guitang06-3283）	GX
		146	Guiyin5(RB72/454)	GX
		147	Guifu98-296	GX
		148	Liucheng03-1137	GX
		149	Liucheng05-136	GX
		150	Funong30（Funong99-20169）	FJ
		151	Funong38（Funong02-5707）	FJ
		152	Funong39（Funong02-6404）	FJ
		153	Funong41（Funong1110）	FJ
		154	Funong43（Funong07-3206）	FJ
		155	Funong07-2020	FJ
		156	Mintang86-2121	FJ
		157	Mintang92-505	FJ
		158	Mintang95-261	FJ
		159	Mintang96-1409	FJ
		160	Mintang96-6016	FJ
		161	Mintang01-77	FJ
		162	Mintang02-205	FJ
		163	Yuetang89-240	GD
		164	Yuetang94-128	GD
		165	Yuetang95-168	GD
		166	Yuetang96-86（Yuetang53）	GD
		167	Yuetang99-66（Yuetang55）	GD
		168	Yuetang00-236	GD
		169	Yuetang00-318	GD
		170	Yuetang02-305	GD
		171	Yuetang03-373	GD
		172	Yuetang03-393（Yuetang60）	GD
		173	Yuegan40（Yuetang05-267）	GD
		174	Yuegan43（Yuetang06-23）	GD
		175	Yuegan46（Yuetang07-516）	GD
		176	Qianzhe08-526（Qiantang6）	GZ
		177	Qianzhe08-536（Qianzhe7）	GZ
		178	Gannan95-108	GX
		179	Gannan02-70	GX
		180	Gannan07-538	GX
