# Supplementary material for: Development of SLAF-Sequence and Multiplex SNaPshot Panels for Population Genetic Diversity Analysis and Construction of DNA Fingerprints for Sugarcane
Source: Genes (Basel). 2022 Aug 19;13(8):1477. doi: 10.3390/genes13081477 (PMC9408448; doi:10.3390/genes13081477)
Supplement: Supplementary file 1 [file genes-13-01477-s001.zip › Supplementary Table S3.xlsx]

## Sheet: 103
		Table S3. SLAF-sequencing results of 103 sugarcane accessions
		code	Raw base	Clean base	GC Percentage(%)	Q30 Percentage(%)	Mapped(%)	Properly_mapped(%)	SLAF number	Total depth	Average depth	Total SNP	SNP num	Integrity	Heter ratio
		1	4916592	2376107	43.18	91.71	98.05	66.71	105147	1295932	12.32	7869726	1653589	0.2101	0.061
		2	3417177	1653298	45.17	90.91	97.71	65.62	107420	842442	7.84	7869726	1705572	0.2167	0.0651
		3	1764772	851236	45.57	89.96	97.57	61.09	78463	408322	5.2	7869726	1095427	0.1392	0.0441
		4	5700068	2725439	44.47	90.92	97.56	58.87	112471	1147938	10.21	7869726	2110211	0.2681	0.0678
		5	5016862	2426890	45.22	89.87	97.64	67.04	112832	1358732	12.04	7869726	1723920	0.2191	0.0633
		6	4937158	2371235	44.29	91.36	97.96	62.24	105790	1178578	11.14	7869726	1792170	0.2277	0.061
		7	3823085	1844440	45	91.36	97.81	63.5	99518	899340	9.04	7869726	1705718	0.2167	0.0615
		8	2781217	1346812	44.01	90.34	97.77	65.29	91987	738396	8.03	7869726	1274405	0.1619	0.052
		9	4715756	2253276	44.35	90.38	97.14	57.59	104627	999586	9.55	7869726	1677244	0.2131	0.0569
		10	4978491	2393205	45.1	90.1	97.65	62.55	110694	1174922	10.61	7869726	1813756	0.2305	0.0626
		11	2665186	1284362	44.64	91.93	97.48	61.51	88450	623117	7.04	7869726	1349538	0.1715	0.0507
		12	2503144	1211008	44.33	90.12	97.98	64.79	91259	649617	7.12	7869726	1254300	0.1594	0.0514
		13	4102229	1982818	43.66	91.11	97.58	66.66	106734	1082796	10.14	7869726	1569717	0.1995	0.0547
		14	4562512	2201166	43.71	91.04	97.69	65.4	112062	1159702	10.35	7869726	1751881	0.2226	0.0612
		15	5133553	2472444	45.02	89.9	97.6	63.88	116794	1182883	10.13	7869726	2040979	0.2593	0.0688
		16	4516601	2172466	43.22	91.68	97.91	63.37	99491	1160687	11.67	7869726	1452166	0.1845	0.0535
		17	2771089	1336189	45.32	91.8	97.27	61.55	89981	574679	6.39	7869726	1585069	0.2014	0.0546
		18	2829829	1368848	44.7	89.83	97.75	64.15	90864	725107	7.98	7869726	1312777	0.1668	0.0539
		19	4440935	2122572	44.26	91.29	97.37	59.56	104158	1031464	9.9	7869726	1613286	0.205	0.0563
		20	2409410	1161727	45.03	92.18	97.66	62.07	85946	588688	6.85	7869726	1240066	0.1576	0.0487
		21	6144563	2970020	42.81	91.76	98.01	67.21	109627	1677258	15.3	7869726	1792144	0.2277	0.0637
		22	2160485	1043963	45.35	91.6	97.68	63.55	88758	497198	5.6	7869726	1324486	0.1683	0.0504
		23	3676970	1776785	44.67	89.86	97.78	64.5	100698	925239	9.19	7869726	1596443	0.2029	0.0591
		24	5151837	2493691	43.34	91.32	97.93	68.39	112399	1461454	13	7869726	1608101	0.2043	0.0596
		25	4840875	2337869	44.09	89.92	97.74	66.43	112643	1103738	9.8	7869726	2053037	0.2609	0.067
		26	5254261	2539215	43.19	91.63	98.06	67.53	109771	1401618	12.77	7869726	1801862	0.229	0.0635
		27	2582229	1250724	44.15	90.19	98.02	65.82	93255	676947	7.26	7869726	1328816	0.1689	0.0528
		28	3034319	1467604	45.17	91.47	97.53	63.54	97333	717902	7.38	7869726	1543224	0.1961	0.0596
		29	3759312	1815382	43.49	91.43	97.85	65.36	100057	958246	9.58	7869726	1555465	0.1977	0.0552
		30	3603558	1737306	43.37	91.03	97.44	64.46	102958	895658	8.7	7869726	1501186	0.1908	0.0515
		31	3247878	1571130	43.9	89.43	97.47	67.56	99097	778234	7.85	7869726	1503931	0.1911	0.0538
		32	4516143	2159038	43.85	91.7	97.96	59.91	101683	992233	9.76	7869726	1788568	0.2273	0.0627
		33	2208274	1068190	44.83	89.7	97.6	63.13	84305	516304	6.12	7869726	1286409	0.1635	0.048
		34	3848146	1861304	44.89	90.82	97.53	66.2	106249	967505	9.11	7869726	1690780	0.2148	0.0588
		35	5267114	2554378	44.44	90.21	98.03	70.87	121054	1475092	12.19	7869726	1844654	0.2344	0.0699
		36	4254991	2046543	43.86	91.35	97.95	63.69	105162	966343	9.19	7869726	1883626	0.2394	0.0626
		37	3015439	1456793	44.5	91.85	97.85	63.72	95262	744611	7.82	7869726	1462836	0.1859	0.0554
		38	2555549	1236171	45.03	89.89	97.68	62.43	88379	631003	7.14	7869726	1281294	0.1628	0.0545
		39	3702226	1776991	45.2	90.19	97.74	60.68	101958	840146	8.24	7869726	1574815	0.2001	0.0553
		40	7246450	3469106	44.89	90.57	97.79	58.08	116033	1506913	12.99	7869726	2423647	0.308	0.0861
		41	2986820	1437756	44.71	91.26	97.74	62.2	89030	661409	7.43	7869726	1520282	0.1932	0.0541
		42	5555136	2684692	43.68	92.27	97.95	66.16	103060	1428328	13.86	7869726	1850303	0.2351	0.0658
		43	3161399	1531320	44.7	89.63	97.67	65.26	97260	795603	8.18	7869726	1521106	0.1933	0.0574
		44	4977419	2407866	43.66	91.32	97.73	67.9	112815	1409383	12.49	7869726	1626825	0.2067	0.0622
		45	3274307	1577336	45.01	89.41	97.12	62.84	98469	685392	6.96	7869726	1639760	0.2084	0.0545
		46	4454566	2138379	43.76	91.59	98	62.6	101192	1087384	10.75	7869726	1601510	0.2035	0.0567
		47	3290896	1591679	44.61	91.79	97.78	65.61	98871	847237	8.57	7869726	1499220	0.1905	0.0561
		48	2497409	1207862	44.41	89.82	97.7	64.14	91386	602569	6.59	7869726	1375389	0.1748	0.0504
		49	2752433	1327574	44.88	90.09	97.33	63.91	92255	575609	6.24	7869726	1477185	0.1877	0.0498
		50	3804032	1830353	44.06	91.71	97.98	62.87	93810	862848	9.2	7869726	1614314	0.2051	0.0557
		51	3664965	1753082	44.53	90.53	97.8	60.13	98318	773938	7.87	7869726	1604251	0.2039	0.0547
		52	2889427	1393732	43.22	90.11	97.34	63.97	90955	616218	6.78	7869726	1458957	0.1854	0.0497
		53	5192363	2498005	44.61	90.31	97.74	63.69	105414	1142888	10.84	7869726	1763076	0.224	0.058
		54	6075812	2902155	44.87	91.27	97.65	58.24	101756	1188752	11.68	7869726	2009126	0.2553	0.0729
		55	2763853	1327828	44.52	90.08	97.84	60.98	90358	643395	7.12	7869726	1387825	0.1763	0.0522
		56	4913812	2386610	42.84	92.01	97.7	70.89	106141	1526543	14.38	7869726	1334363	0.1696	0.0623
		57	7076225	3428674	42.18	92.7	98.07	69.87	106813	2131531	19.96	7869726	1562918	0.1986	0.0625
		58	4900255	2378297	44.16	89.71	97.32	69.69	110571	1452555	13.14	7869726	1451679	0.1845	0.0663
		59	6856094	3323658	43.51	91.23	97.69	69.67	117540	1973655	16.79	7869726	1678442	0.2133	0.0808
		60	4104494	1991016	44.08	92.04	97.93	67.67	101144	1183263	11.7	7869726	1373674	0.1746	0.0642
		61	2846398	1380489	44.06	90.11	97.91	66.85	94974	794481	8.37	7869726	1226212	0.1558	0.0561
		62	4177724	2027486	42.49	91.56	97.92	70.72	103719	1295524	12.49	7869726	1264638	0.1607	0.057
		63	6187178	3000703	44.04	90.25	97.57	69.69	114113	1846157	16.18	7869726	1567730	0.1992	0.0707
		64	3892482	1889265	42.08	92.25	98.08	70.77	97795	1209990	12.37	7869726	1159362	0.1473	0.0574
		65	5665433	2747586	44.54	90.23	97.65	69.83	113384	1689621	14.9	7869726	1535127	0.1951	0.0696
		66	6192089	3010397	44.95	90.21	97.65	71.32	112992	1911838	16.92	7869726	1505328	0.1913	0.0718
		67	4204433	2039106	43.93	89.45	97.73	67.6	103145	1207825	11.71	7869726	1418663	0.1803	0.0622
		68	4566892	2212803	42.88	91.49	97.83	69.44	105657	1389618	13.15	7869726	1312066	0.1667	0.0575
		69	4148287	2012276	42.85	91.38	97.58	69.65	107071	1252481	11.7	7869726	1346544	0.1711	0.0601
		70	4059237	1977728	44.01	91.25	98.54	74.96	96980	1076222	11.1	7869726	1696333	0.2156	0.0558
		71	4217357	2054373	45.69	90.79	98.3	73.4	105887	1031606	9.74	7869726	2036991	0.2588	0.0651
		72	5599164	2729785	43.07	92.54	98.62	76.04	104969	1489091	14.19	7869726	2059453	0.2617	0.0684
		73	3998559	1952148	42.73	89.84	97.39	74.97	100737	1163959	11.55	7869726	1562322	0.1985	0.0636
		74	3705394	1806301	43.85	90.31	98.33	75.54	104399	1036111	9.92	7869726	1705360	0.2167	0.0672
		75	3093108	1505451	44.04	91.72	98.56	74.89	92158	832878	9.04	7869726	1546181	0.1965	0.0543
		76	5164263	2512086	43.69	91.48	98.4	74.57	106830	1395216	13.06	7869726	1976004	0.2511	0.071
		77	3784479	1846618	44.74	91.73	98.56	75.33	97152	1120205	11.53	7869726	1587497	0.2017	0.0677
		78	4925111	2402698	43.94	91.54	98.68	76.57	106620	1405238	13.18	7869726	1772983	0.2253	0.0665
		79	3342056	1630755	45.38	91.58	98.25	74.81	98446	851517	8.65	7869726	1710863	0.2174	0.065
		80	3015033	1471191	45.67	91.48	98.48	73.3	97816	762805	7.8	7869726	1620563	0.2059	0.0686
		81	3864451	1885451	44.61	89.91	98.54	74.67	100157	1107174	11.05	7869726	1661168	0.2111	0.0663
		82	3426489	1665335	44.18	91.04	98.61	75.14	103251	932437	9.03	7869726	1508304	0.1917	0.059
		83	5479801	2673351	44.44	90.28	98.42	76.94	113045	1609091	14.23	7869726	1870634	0.2377	0.0742
		84	3122271	1524293	42.68	90.92	98.64	77.49	88790	956036	10.77	7869726	1312054	0.1667	0.0564
		85	4487620	2186460	45.33	91.74	98.37	73.53	105691	1212581	11.47	7869726	1874306	0.2382	0.0695
		86	3257146	1582418	45.59	89.82	98.49	71.38	95685	878142	9.18	7869726	1596282	0.2028	0.0627
		87	3792698	1850379	43.92	91.21	98.39	76.39	102486	1120508	10.93	7869726	1603040	0.2037	0.064
		88	6781146	3310237	45.17	89.96	98.47	76.68	116703	1957282	16.77	7869726	2042028	0.2595	0.0743
		89	3883897	1890378	43.34	92.07	98.7	75.97	97825	1135586	11.61	7869726	1604354	0.2039	0.0614
		90	3395153	1655853	44.83	92.13	98.67	74.22	95011	963316	10.14	7869726	1543807	0.1962	0.0642
		91	3084605	1504660	44.97	90.06	98.7	73.42	95543	870295	9.11	7869726	1539500	0.1956	0.0659
		92	2913975	1420146	43.08	91.97	98.63	76.57	89529	858289	9.59	7869726	1363422	0.1732	0.0533
		93	7361174	3573256	44.13	90.22	97.44	70.82	117445	2230373	18.99	7869726	1582481	0.2011	0.0805
		94	7603301	3694808	44.36	90.4	97.91	72.14	122780	2344713	19.1	7869726	1725690	0.2193	0.088
		95	6886154	3339996	43.26	91.23	97.74	70.09	114053	2107441	18.48	7869726	1501457	0.1908	0.0726
		96	7364602	3573298	42.68	92.46	98	69.89	108715	2277927	20.95	7869726	1455974	0.185	0.0711
		97	7173713	3479457	43.01	91.21	97.8	70.35	113579	2235496	19.68	7869726	1436028	0.1825	0.0702
		98	6953138	3373807	43.97	90.05	97.75	70.61	112801	2123433	18.82	7869726	1493819	0.1898	0.0739
		99	6580324	3193557	43.09	90.91	97.9	70.01	111224	2016629	18.13	7869726	1483143	0.1885	0.0723
		100	4245648	2061058	44.15	91.46	97.59	68.02	104609	1219918	11.66	7869726	1413773	0.1796	0.0697
		101	3406278	1652479	44.02	90.32	97.92	67.99	101765	981465	9.64	7869726	1318392	0.1675	0.0658
		102	3723921	1804572	42.94	91.34	97.73	70.23	99210	1151963	11.61	7869726	1119488	0.1423	0.0548
		103	9497754	4659676	43.97	90.35	98.49	81.22	124732	3108571	24.92	7869726	1909435	0.2426	0.0967
				273670	41.41	93.08
