# Supplementary material for: Development of SLAF-Sequence and Multiplex SNaPshot Panels for Population Genetic Diversity Analysis and Construction of DNA Fingerprints for Sugarcane
Source: Genes (Basel). 2022 Aug 19;13(8):1477. doi: 10.3390/genes13081477 (PMC9408448; doi:10.3390/genes13081477)
Supplement: Supplementary file 1 [file genes-13-01477-s001.zip › Supplementary Table S4.xlsx]

## Sheet: Sheet1
		Table S4. Information of 32 core SNP primers
		Code	primer name	Chr	position	SNP1 allele	Forward Primer	Reverse Primer
		1	GZZH003	1A	S1A_36246179	G/A	F1:GGAAAAACCATGGACCAAGCAC	R:CAWTGGGTTCACAACCGCTCT
							F2:TTTTTTTTTTTTTTCGCCTGGGTACTAGCCACTAGY
		2	GZZH005	1A	S1A_61098507	C/T	F1:CCTTTGTTATGCCCTCTAGAAATCG	R:AAGGATGACCCTAGCGTACCGAC
							F2:TTTTTTTTTTTTTTTTTTTTGGAAGATCTTCTGATTGATAGTACACT
		3	GZZH007	1A	S1A_97200609	C/A	F1:GTTCCACACTCATGGCTAGTTTCATC	R:CATGGCTACCTAAAAATCTCTAACRGTCTA
							F2:TTTTTTTTTTTTTTTTTTTTTTTTTTTTTTTTTTTTTTTTTTTTTTGTTTTCAATGGGAAGGCTC
		4	GZZH012	1B	S1B_80932499	G/A	F1:GGGCACCCTAGGTTTGACATTC	R:GTTGGTTGGTTTGAAATCCCTCA
							F2:TTTTTTTTTTTTGATTTTGTACTTGTGCTCTTATAATTTAGG
		5	GZZH015	1B	S1C_12824231	G/A	F1:AACCCCAATTAACTTGCACGAG	R:TTAAAACTTTGCATTTGTGCCTATC
							F2:ATGCCAGCATGTATTTTATTATAAATG
		6	GZZH016	1C	S1C_25541345	C/T	F1:GAAGACTTCAGGGTCTTCCAGAATG	R:GACATGAGGCGTCGAGCAG
							F2:ATGGCCAAACGACGAGTACA
		7	GZZH020	1C	S1C_74441048	A/T	F1:TAGGTTGTTCTGCTGTTGTTATTTTTC	R:TGGAGTAGATCCATCCAGCTCAG
							F2:TTTTTTTTTTTTTTTTTTTTTTTTTTTTTTTTTGTACTGACTTTAGATTGTAGGGCTC
		8	GZZH021	1C	S1C_86419064	G/A	F1:TAACTCAGTCAGTGGCCTACTAAGCAT	R:GCTTGTTCCAAAGTTGAGTACCTTA
							F2:TTTTTTGACCCAGCTAAGATTATAGTTGTACAA
		9	GZZH028	1D	S1D_89362259	C/T	F1:TTGTAACCCCTACTACGAGYACCCTG	R:TATCCTGAGAAGGGTTTTGTCGA
							F2:TTTTTTTTTTTTTAGTAGCAACATCCACTGGACG
		10	GZZH039	2B	S2B_25521624	G/A	F1:TATGCCTTTTCATGATTTTGAATG	R:TATCATAAGCAGAGATGCACAAATG
							F2:TTTTTTTTTTTACAAATGGCCTTACAAATTAACTTCTA
		11	GZZH040	2B	S2B_38472963	C/T	F1:GTGTAGGTATAACCAGCAATTTCCTC	R:TAGCATGCACGCCCCTAACTA
							F2:TTTTTTTTTTTTTTTTTTTTTTTTTTTCATAGGACMACACTTAGACAAACCA
		12	GZZH041	2B	S2B_50911981	T/C	F1:TCATCGTTGAAGTGAAACCATCTC	R:ATCATTACTCTTGGTGTGCAAGGTC
							F2:TTTTTTTTTTTTTTTGYTGTTTAGCTAGGAGTTTATATTTTGTTA
		13	GZZH047	2C	S2C_26875586	T/C	F1:ACCGAAACTGATTGTTTACGCAAC	R:GCGACTTATAATTTTAAACGAAAGGAG
							F2:TTTTTTTTTTTTTTTTTTTTTAAAGCGAACATTCCAATCAAGTA
		14	GZZH057	2D	S2D_51515267	G/A	F1:CAATAAATCAAGGGGAAAGCCGTA	R:CGGCCCCATCACGTCTCT
							F2:TCAAGGGGAAAGCCGTACCT
		15	GZZH068	3B	S3B_26907876	A/G	F1:AATCATTTTGGATGCACTGACTTCT	R:ATGCAATCGGTGCAAATCATGT
							F2:TTTTTTTTTTACAGTCTCCAAATGGACCAAAA
		16	GZZH077	3C	S3C_50999519	G/A	F1:GAAACCCAGGCTCCATCCTAT	R:GGTCGTGCTCCAATGTGAC
							F2:TTTTTTTTTTTTTTTTTTTTTGAGACCGTCTGTAATGTACACTAACATC
		17	GZZH082	3D	S3D_26395122	G/A	F1:CTAGTTTTCTGGAGATTTGCCAACT	R:GCTTTTCAAGGTGTGGGTTG
							F2:TTTTTTTTTTTTTTTTTTTTTTTTTTTATTGTTTTTTCGCTTGTACCAATTC
		18	GZZH083	3D	S3D_36890841	T/G	F1:GCATTGGTTCACTATTGTTTTCCAC	R:GCTGCATGATCCCACAAGAG
							F2:TTTTTTTTTTTTTTTTTTTTTTTTTTTTTTTTTTTTTTATGTCACGGAGCACCTTCAAA
		19	GZZH086	4A	S4A_13512990	A/T	F1:CACAAGGAAGGCATAAGCCATAAG	R:TTGGGGAAACTGAACCTACCATC
							F2:TTTTTTTTTTTTTTTTTTTTTTTTTTTTTTTTTTTTTTACATCACTCTATTTATTTGAATTCCATC
		20	GZZH087	4A	S4A_25740331	T/A	F1:CATCTGAATTCTTTGGTGCAGACT	R:GCTACCTGATGAGAAGGAAATTGAG
							F2:TTTTTTTTTTTTTTTTTTTTTTTTTTTTTTTTTTTTTTTTTTCTCGATTTCCATGTCTCCAA
		21	GZZH097	4C	S4C_27655330	C/T	F1:TTCGCCAGACCCTTAGATTGATG	R:ATTGGTCTGTAGCTGGTAAGTCACTC
							F2:TTTTTTTTTTTTTTTTTTTTTTTTTTTTTTAGCCTTTGTATGCAGCATGTCTAC
		22	GZZH101	4D	S4D_12789524	G/A	F1:ATTGGTCTGTAGCTGGTAAGTCACTC	R:ACCAAGAAGTCCATCTTCAACTCAG
							F2:TTTTTTTTTTTTTTTTTTTTTTTTTTTTTTGTTCTGCTGTAAGAGTCAGTGAACA
		23	GZZH104	4D	S4D_52306711	C/T	F1:TTTACTAACAGAAACCGTGAACCTAT	R:ACAAATATCTGGCTAGGGCACTG
							F2:TTTTTTTTTTTTTTTTTTTTTTTTCCTTTTGTTCACCTTAATATAATGCTT
		24	GZZH117	5B	S5B_64285860	C/T	F1:TCATTCAAAAAGTGCAGCAACTG	R:AACTGTGAACTCACCTATCCCAAC
							F2:ACCTATCCCAACCATGGCTCT
		25	GZZH120	5C	S5C_25461312	C/T	F1:CAATGTAATCAACATGCAGCAAACT	R:ACTGTCTGGAGCAACACTGACAT
							F2:TTTTTTTTTTTTTTTTTTTTTTTCAATTGACAAGGAAAGAAAATTGAT
		26	GZZH133	6A	S6A_39807913	T/A	F1:AGCACCCACTAAGGACTGCTCAAG	R:GATAAGATGCCAAGGAGTAGAAAGTGTG
							F2:TTTTTTTTTTTTTTTTTTTTTTTTTTTTTTTTTTTTTTTTTCACTAAGAGTACCCCTTCTCCATC
		27	GZZH150	6D	S6D_13545516	T/C	F1:AGAGTTGTCGCTGTACATTGCTT	R:ATACAGCGGGACTGAGAGCATC
							F2:TTTTTTTTTTTAAGTGGCGGCGTTGCCGTACTC
		28	GZZH154	6D	S6D_65435990	T/C	F1:GGTCATGAAGAAGACGCCAATG	R:CCAATAGTTGAGGGGTCAAAAGTG
							F2:TTTTTTTTTTTTTTTTTTTTTTTTTTATTCAAYAGCARCTGAGCTACACAA
		29	GZZH160	7A	S7A_65706980	T/C	F1:CCATAGTGGTAACTAGAGCTTTCAAGG	R:CGTCGCCTCAACGACAATC
							F2:TTTTTTTTAGCCTACCATTTCCACCGTGG
		30	GZZH170	7C	S7C_62122151	C/T	F1:GTATGTTTGCGCCTCTTGATG	R:GGTTCTCTTGATCTCTCAGGTCC
							F2:TTTTTTTTTTTTTTTTTTTTTTTTCGCCTCTTGATGTACTAGTTTACACTA
		31	GZZH174	7D	S7D_42626995	A/T	F1:CATTTTTTGATGACAGGTTATACTCCA	R:CCACAAAGGCTACAAAATGTGAC
							F2:TTTTTTTTTTTTTTTTTTTTTTTTTTTTTTTTTTTTTTGGTAATTTGATATCCTCTKCCTYAGTTGTT
		32	GZZH184	8B	S8B_52127804	G/T	F1:CAGGCAACATGGATATGACTG	R:CGGCAATCAAGTCCTCTAGCA
							F2:TTTTTTTTTTTTTTTTTTTTTTTTTTTTTTTGAGTATCTCTTTACTTCTCAATTCATAATCTA
