# Supplementary material for: Development of SLAF-Sequence and Multiplex SNaPshot Panels for Population Genetic Diversity Analysis and Construction of DNA Fingerprints for Sugarcane
Source: Genes (Basel). 2022 Aug 19;13(8):1477. doi: 10.3390/genes13081477 (PMC9408448; doi:10.3390/genes13081477)
Supplement: Supplementary file 1 [file genes-13-01477-s001.zip › Supplementary Table S5.xlsx]

## Sheet: Sheet1
		Table S5. Information of 11candidate SNP primers
		primer name	Chr	position	SNP1 allele	Forward Primer	Reverse Primer
		GZZH008	1B	S1B_28055966	A/G	F1:AAAAATTGGCAGGTGAAAGAGTACTG	R:GTTCACCTAAGTGGATAGCTTGGGTA
						F2:TTTTTTTTTTTTTTTTTTTTTTATCCAAGGCTTTTTTTTTCGTCGC
		GZZH011	1B	S1B_67261192	T/C	F1:GTTTAACAGAGCCGGAGGACCTA	R:CAGGGTGAGCAGGAGTAAGGTTA
						F2:TTTTTTTTTTTTTTTTTTGTTACAACAAGGTAAAGGGCTCAA
		GZZH019	1C	S1C_61532319	C/T	F1:AGCTAGTTTTGAATCACGTGACGT	R:CAAGAGAGAAGGCTTGGAGCC
						F2:TTTTTTTTTTTTTTTTTTTTTTTTAGGGGATCTTTAAATAGACCTTGG
		GZZH023	1D	S1D_27778820	C/T	F1:AAACTGAATTTTATTACCAAGACAACG	R:TGTTCGTTCAGGCAAATAGTCCA
						F2:TTTTTTTTTTTTTTTTTTTTTTTTTTTGCTCAAAGTTCAAGTACCACTGAC
		GZZH029	1D	S1D_102435699	A/G	F1:TGAATTTTAATGATATTGACTGATGCAG	R:TTTGTAAAGCTTCCCATGCATGAC
						F2:TTTTTTTTTTTTTTTTTTTTTTTTTTTTTTTGTTTTTCTACCAGCCTGAAAAATAGA
		GZZH044	2B	S2B_93438793	T/C	F1:CACGTTCACCTTCGGTCACA	R:GCAGGTCTTAGGTTTCCAAGGTA
						F2:TTTTTTTTTTTTTTTTTTTAAGGGGGCCAATACCCTCTTT
		GZZH053	2C	S2C_113365946	T/A	F1:TGGAGTATCCATGCCAATTACGAG	R:AGTCGCCGCTAAAAAGAAGCA
						F2:TTTTTTTTTTTTTTTTTTTTTTTTTTTTTTTTTTTTTTTTTTATTCTATTGCATCTTCTATTCCTAGGG
		GZZH085	3D	S3D_6102039	T/C	F1:CTCACTATACAACCTGTAGTAATCTGTGAAT	R:ACCTGAATGGAGCAACTGTGC
						F2:TTTTTTTTTTTTTTTTTTGGAAAAATCCAGAGAACAGGAGTAC
		GZZH141	6B	S6B_52544817	G/A	F1:TGTATTAGTGTGAGAGAACTTACCCTATG	R:ACCCAAATTGATGGGTCTTCC
						F2:TTTTTTTTTTTTTTTTTTTTTTCACTGCATTAATGTACACATATAGTCACCTAC
		GZZH173	7D	S7D_28349540	T/C	F1:TACCTGGCAAGCGAAACTCAC	R:GTGCACAATTCTGAGGATTGATTATG
						F2:TTTTTTTTTTTTTTTTTTTTTTTTTGGTTTTCTGCAGTCGTAATTAGTG
		GZZH186	8C	S8C_26878631	G/T	F1:GAACTTCCGGTCCGATCTATCTT	R:GCTATTTCTTTGCTTAAGTTCTTCACT
						F2:TTTTTTTTTTTTTTTTTTTTTTTTTTTTTTTTTTTTTTTTAATTATTGCTGCCTGCGCTCTAG
