# Supplementary figures and images for: Development of SLAF-Sequence and Multiplex SNaPshot Panels for Population Genetic Diversity Analysis and Construction of DNA Fingerprints for Sugarcane
Source: MDPI journal article supplement (doi:10.3390/genes13081477), 2022-08-19

## Supplementary Figure S1

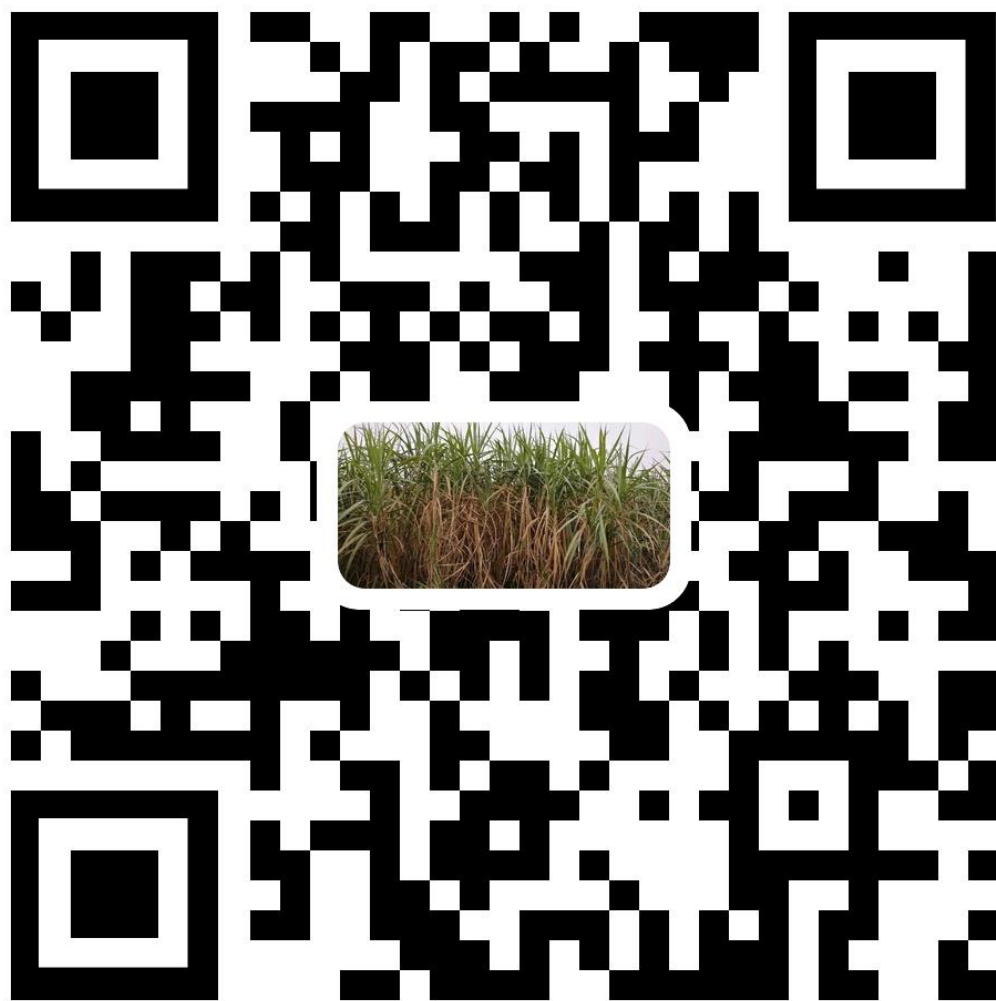

The QR code of Funong 41

Supplement: s1 [file s1]
